# Supplementary material
Source: ML conference proceedings conference paper supplement (https://openaccess.thecvf.com/content/ICCV2023/html/Wu_S-VolSDF_Sparse_Multi-View_ICCV_2023_paper.html)
Supplement: Supplementary file 2 [file Wu_S-VolSDF_Sparse_Multi-View_ICCV_2023_supplemental.zip]

Archive with 4 entries (4 files):
- 09034-supp.pdf
- __MACOSX/._09034-supp.pdf
- final.mp4
- __MACOSX/._final.mp4
